# Supplementary material
Source: PubMed Central journal article supplement (PMC5828036)
Supplement: NIHMS942314-supplement-1.pdf [file NIHMS942314-supplement-1.pdf]

## Supplementary Online Content

Esplin MS, Elovitz MA, Iams JD, et al; for the nuMoM2b Study. Predictive accuracy of serial transvaginal cervical lengths and quantitative vaginal fetal fibronectin levels for spontaneous preterm birth among nulliparous women. *JAMA*. doi:10.1001/jama.2017.1373

**eTable 1.** Baseline Characteristics for Women With and Without Pregnancy Outcome Data Available

**eFigure 1.** Sensitivity and Specificity for Visit 3 Cervical Length Cutoffs Predicting Spontaneous Preterm Birth <37 Weeks' Gestation

**eFigure 2.** Sensitivity and Specificity for Visit 3 Fetal Fibronectin Cutoffs Predicting Spontaneous Preterm Birth <37 Weeks' Gestation

This supplementary material has been provided by the authors to give readers additional information about their work.

eTable 1

## Baseline Characteristics for Women With and Without Pregnancy Outcome Data Available

| Baseline Characteristics                                | Outcome Data Available<br>(N = 9,579) | Outcome Data Unavailable<br>(N = 459) | P-value <sup>a</sup> |
|---------------------------------------------------------|---------------------------------------|---------------------------------------|----------------------|
| <b>Maternal age, in years</b>                           |                                       |                                       |                      |
| Median (IQR)                                            | 27.0 (9.0)                            | 26.0 (9.0)                            | P<.001               |
| Category: n (%)                                         |                                       |                                       | 0.002                |
| 13-21                                                   | 2,007 (21.0)                          | 126 (27.9)                            |                      |
| 22-35                                                   | 6,926 (72.3)                          | 296 (65.5)                            |                      |
| >35                                                     | 643 (6.7)                             | 30 (6.6)                              |                      |
| <b>Maternal race/ethnicity: n (%)</b>                   |                                       |                                       | P<.001               |
| White Non-Hispanic                                      | 5,779 (60.3)                          | 210 (46.5)                            |                      |
| Black Non-Hispanic                                      | 1,332 (13.9)                          | 86 (19.0)                             |                      |
| Hispanic                                                | 1,599 (16.7)                          | 101 (22.3)                            |                      |
| Asian                                                   | 383 (4.0)                             | 24 (5.3)                              |                      |
| Other                                                   | 483 (5.0)                             | 31 (6.9)                              |                      |
| <b>BMI, in kg/m<sup>2</sup></b>                         |                                       |                                       |                      |
| Median (IQR)                                            | 24.6 (7.2)                            | 24.6 (7.0)                            | 0.26                 |
| Category: n (%)                                         |                                       |                                       | 0.37                 |
| <25                                                     | 4,972 (53.0)                          | 223 (52.1)                            |                      |
| 25 to <30                                               | 2,326 (24.8)                          | 118 (27.6)                            |                      |
| ≥30                                                     | 2,086 (22.2)                          | 87 (20.3)                             |                      |
| <b>Gravidity: n (%)</b>                                 |                                       |                                       | 0.99                 |
| 1                                                       | 7,104 (74.2)                          | 334 (73.9)                            |                      |
| 2                                                       | 1,829 (19.1)                          | 87 (19.2)                             |                      |
| 3+                                                      | 643 (6.7)                             | 31 (6.9)                              |                      |
| <b>Smoked during 3 months prior to pregnancy: n (%)</b> |                                       |                                       | 0.24                 |
| Yes                                                     | 1,693 (17.7)                          | 89 (19.9)                             |                      |
| No                                                      | 7,877 (82.3)                          | 359 (80.1)                            |                      |
| <b>Maternal education obtained: n (%)</b>               |                                       |                                       | 0.004                |
| less than high school                                   | 774 (8.1)                             | 42 (9.3)                              |                      |
| completed high school or GED                            | 1,111 (11.6)                          | 60 (13.3)                             |                      |
| some college                                            | 1,833 (19.2)                          | 115 (25.5)                            |                      |
| associate or technical degree                           | 965 (10.1)                            | 40 (8.9)                              |                      |
| completed college                                       | 2,663 (27.8)                          | 109 (24.2)                            |                      |
| degree work beyond college                              | 2,223 (23.2)                          | 85 (18.8)                             |                      |
| <b>Marital status: n (%)</b>                            |                                       |                                       | P<.001               |
| single, never married                                   | 3,729 (39.0)                          | 216 (48.0)                            |                      |
| married                                                 | 5,728 (59.9)                          | 219 (48.7)                            |                      |
| widowed                                                 | 8 (0.1)                               | 0 (0.0)                               |                      |
| divorced                                                | 81 (0.8)                              | 11 (2.4)                              |                      |
| separated                                               | 17 (0.2)                              | 4 (0.9)                               |                      |

Abbreviations: IQR = inter-quartile range; BMI = body mass index

<sup>a</sup> P-values shown are from chi-square tests for outcome data availability and the categorical baseline characteristics and from Wilcoxon rank sum tests for outcome data availability and continuous baseline characteristics.

eFigure 1

**Sensitivity and Specificity for Visit 3 Cervical Length Cutoffs Predicting Spontaneous Preterm Birth <37 Weeks' Gestation**

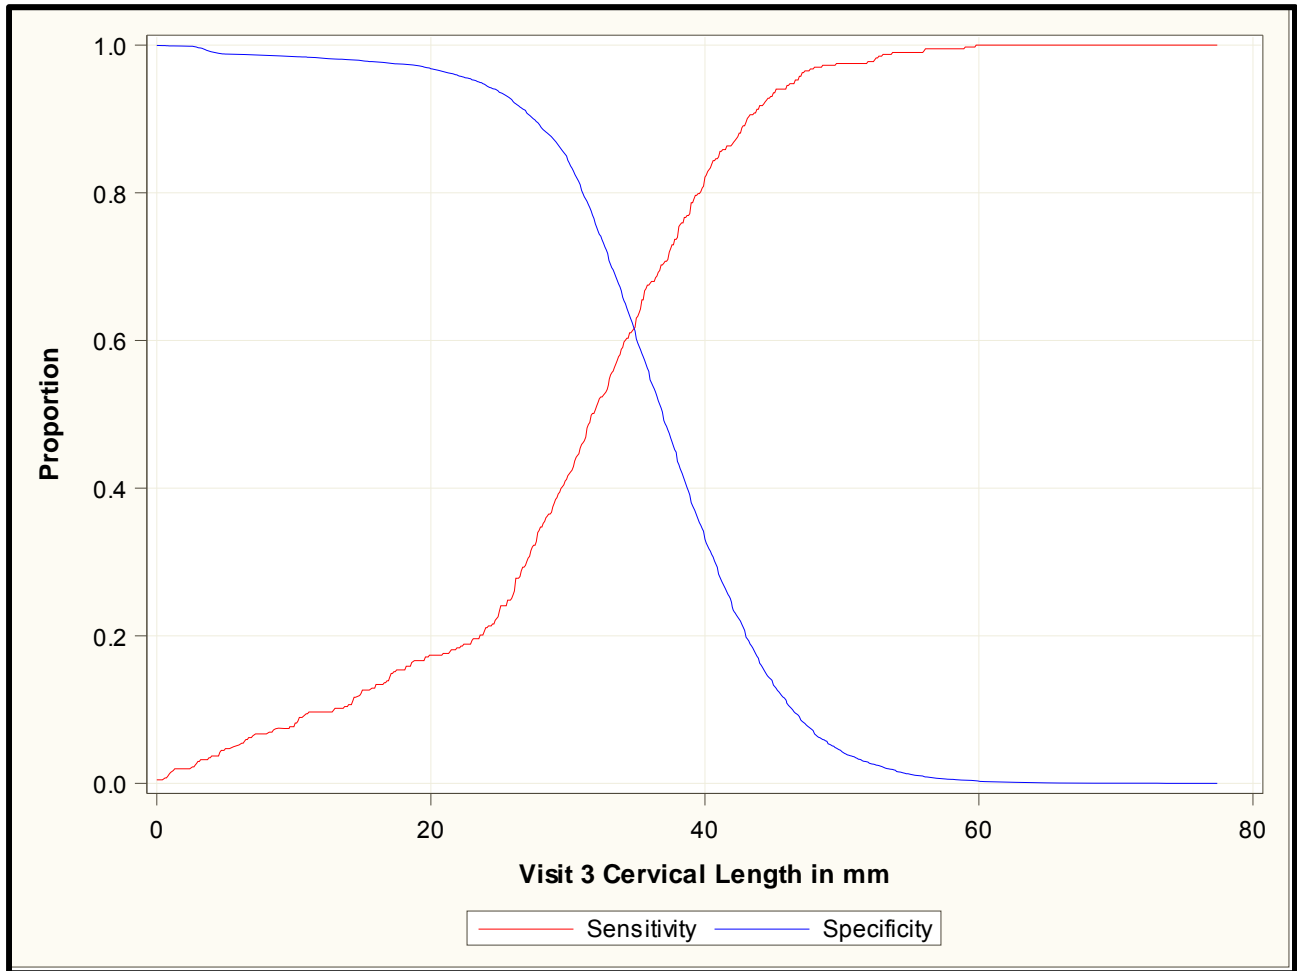

Sensitivity and specificity pairs for spontaneous preterm birth <37 weeks' gestation are shown over a range of cutoff values for cervical length, including all measurement obtained. Sensitivity is defined as the proportion with a cervical length  $\leq$  cutoff among women with spontaneous preterm birth <37 weeks' gestation. Specificity is defined as the proportion with a cervical length  $>$  cutoff among women without spontaneous preterm birth <37 weeks' gestation. The ultrasound used for the cervical length measurement was taken at the nuMoM2b Visit 3, scheduled 22-30 weeks' gestation. At a cutoff of approximately 34.80, sensitivity equals specificity. At a cutoff of 31.70, sensitivity plus specificity is maximized.

eFigure 2

**Sensitivity and Specificity for Visit 3 Fetal Fibronectin Cutoffs Predicting Spontaneous Preterm Birth <37 Weeks' Gestation**

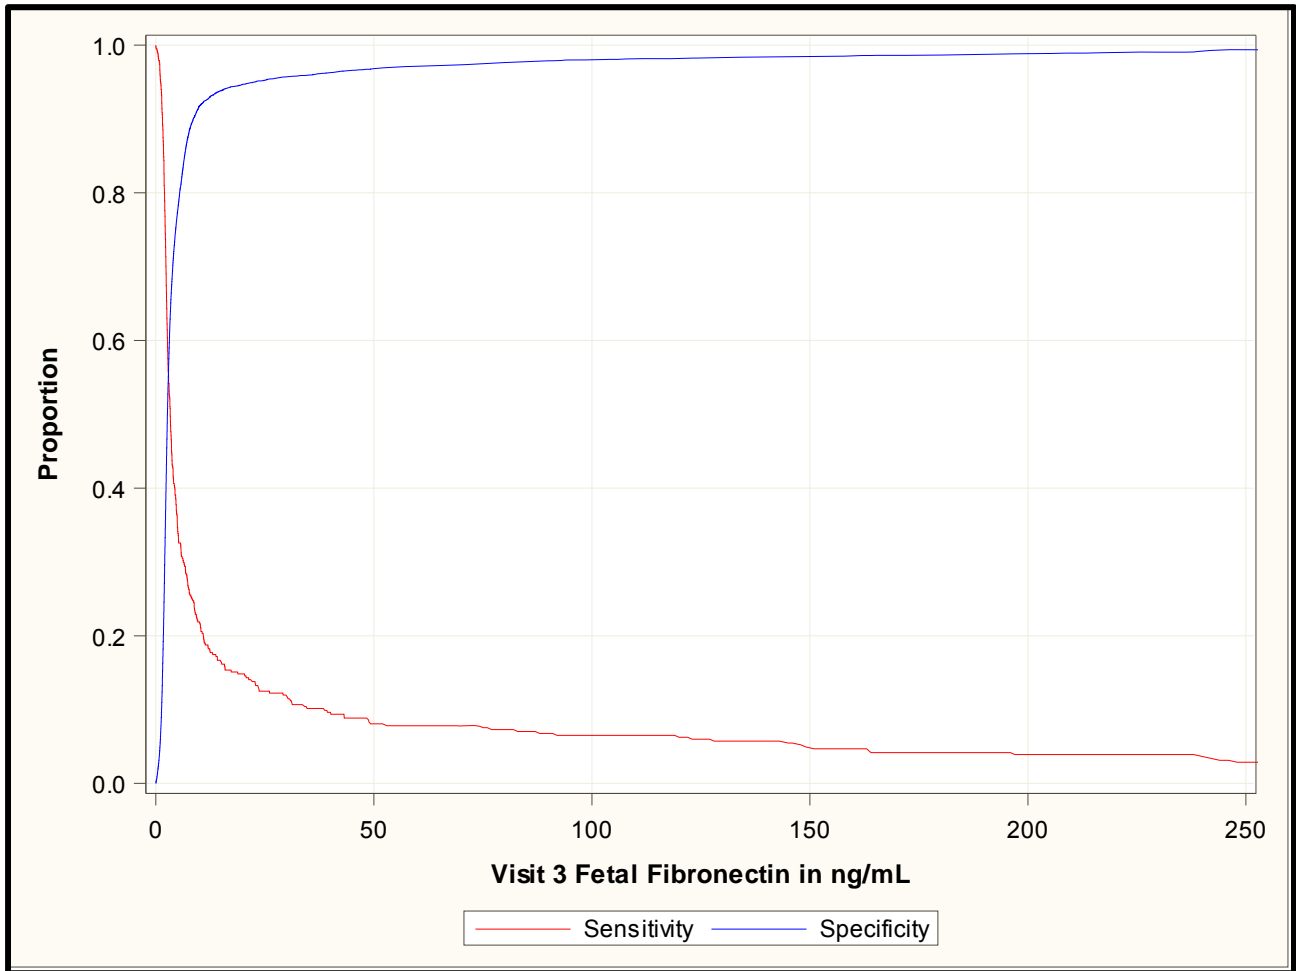

Sensitivity and specificity pairs for spontaneous preterm birth <37 weeks' gestation are shown over the range of cutoff values for fetal fibronectin, 0 to 250 ng/mL. Sensitivity is defined as the proportion of women with fetal fibronectin  $\geq$  cutoff among women with spontaneous preterm birth <37 weeks' gestation. Specificity is defined as the proportion of women with fetal fibronectin < cutoff among women without spontaneous preterm birth <37 weeks' gestation. The sample used for the fetal fibronectin assay was taken at the nuMoM2b Visit 3, scheduled 22-30 weeks' gestation. At a cutoff of approximately 2.880, sensitivity equals specificity. At a cutoff of 7.077, sensitivity plus specificity is maximized.
